# Supplementary material
Source: Springer Nature journal article supplement (https://www.springermedizin.de/resource/supplementary/12899_2012_200_MOESM12_ESM.pdf/9514664)

# Activation of Na<sup>+</sup> channels

# Inactivation of Na<sup>+</sup> channels

A

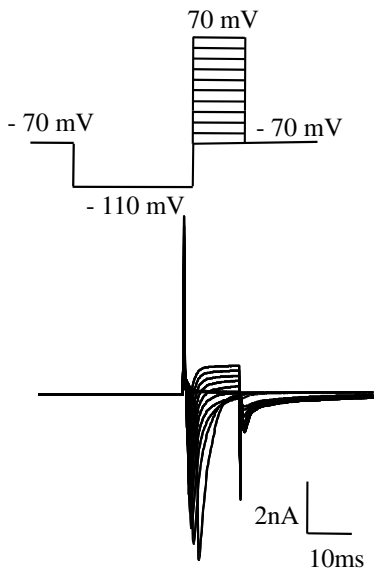

C

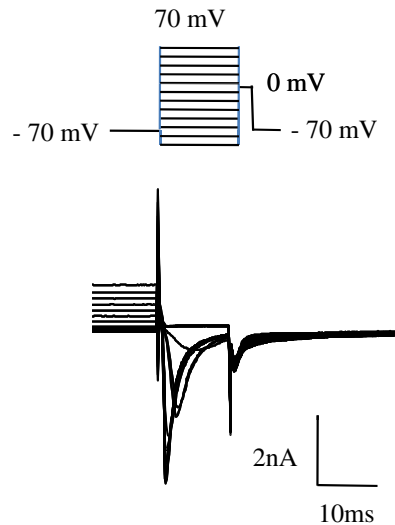

B

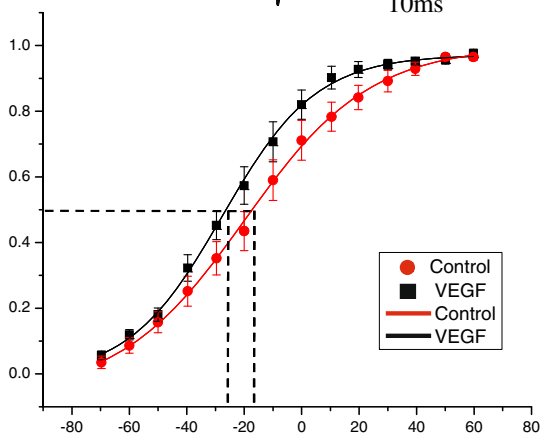

D

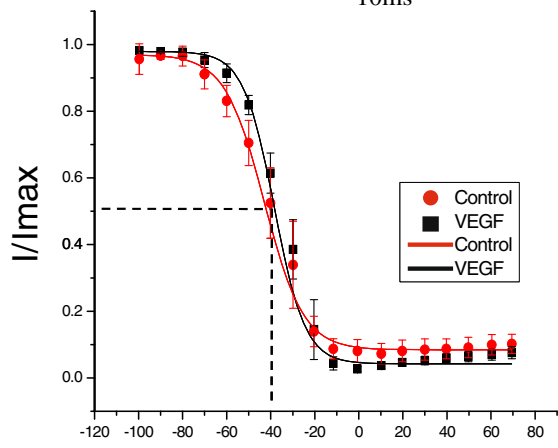

Supplement: MOESM12 [file 9514664]
